# Supplementary material
Source: Elsevier journal article supplement (https://eprints.lib.hokudai.ac.jp/dspace/bitstream/2115/71028/3/mmc2.xlsx)
Supplement: mmc2 [file mmc2.xlsx]

## Sheet: Sheet1
Supplementary Table 2 Adiponectin aconcentration in serum and exosome fraction of mice fed different Lactobacillus strains
	Veicle	L. plantarum type strain	L. plantarum No.14	L. rhamnosus GG
	mg/mL
Serum	5.3 ± 0.7	5.1 ± 0.2	4.5 ± 0.4	4.5 ± 0.6
Exosome	0.054 ± 0.010	0.026 ± 0.005	0.046 ± 0.010	0.025 ± 0.010
